# Supplementary material for: Photochemical isomerization reactions of acrylonitrile. A mechanistic study
Source: Royal Society of Chemistry journal article supplement (doi:10.1039/c7ra12614j), 2018-01-01
Supplement: c7ra12614j1.pdf [file c7ra12614j1.pdf]

# Supplementary Materials

## Photochemical Isomerization Reactions of Acrylonitrile. A Mechanistic Study

Ming-Der Su<sup>1,2\*</sup>

<sup>1</sup>Department of Applied Chemistry, National Chiayi University, Chiayi 60004,  
Taiwan

<sup>2</sup>Department of Medicinal and Applied Chemistry, Kaohsiung Medical  
University, Kaohsiung 80708, Taiwan

\*E-mail: [midesu@mail.ncyu.edu.tw](mailto:midesu@mail.ncyu.edu.tw)

### (1) 1 (Acrylonitrile)

---

| Atomic<br>Number | Coordinates (Angstroms) |          |          |
|------------------|-------------------------|----------|----------|
|                  | X                       | Y        | Z        |
| 1                | 0.000000                | 0.000000 | 0.000000 |
| 6                | 0.000000                | 0.000000 | 1.073894 |
| 6                | 1.150698                | 0.000000 | 1.754928 |
| 1                | 2.113382                | 0.000000 | 1.228753 |
| 1                | -0.953532               | 0.000000 | 1.568559 |
| 6                | 1.206300                | 0.000000 | 3.198030 |
| 7                | 1.251278                | 0.000000 | 4.365393 |

---

CASSCF(12,11)/6-311G(d,p) = -169.974955478

MP2(12,11)/6-311++G(3df,3pd)//CASSCF(12,11)/6-311G(d,p)= -169.9951085

### (2) FC

CASSCF(12,11)/6-311G(d,p) = -169.6845266

MP2(12,11)/6-311++G(3df,3pd)//CASSCF(12,11)/6-311G(d,p)= -169.7200179

### (3) S1/S0-CI

---

| Atomic<br>Number | Coordinates (Angstroms) |           |          |
|------------------|-------------------------|-----------|----------|
|                  | X                       | Y         | Z        |
| 1                | -0.402997               | -0.717679 | 0.029489 |
| 6                | -0.275306               | 0.108375  | 0.702642 |
| 6                | 0.738983                | 0.187611  | 1.565099 |
| 1                | 1.545826                | -0.312469 | 2.020291 |
| 1                | -0.995719               | 0.908705  | 0.674658 |
| 6                | 0.893847                | 0.556914  | 4.626453 |
| 7                | 1.661599                | -0.330225 | 3.835883 |

---

#### Derivative Coupling

|    |               |               |               |
|----|---------------|---------------|---------------|
| -1 | -0.0006894774 | 0.0009277660  | 0.0020458626  |
| -2 | 0.0020082252  | -0.0019575224 | 0.0025365995  |
| -3 | -0.0074703749 | 0.0035887462  | -0.0151570861 |
| -4 | -0.0008835638 | 0.0024543504  | 0.0014335271  |
| -5 | 0.0025017349  | -0.0006002592 | -0.0003041061 |
| -6 | 0.0240038720  | -0.0270279516 | -0.0219132153 |
| -7 | -0.0194704159 | 0.0226148706  | 0.0313584183  |

#### Unscaled Gradient Difference

|    |               |               |               |
|----|---------------|---------------|---------------|
| -1 | 0.0002594426  | -0.0010290998 | -0.0019055180 |
| -2 | -0.0010438218 | 0.0015574800  | 0.0002869697  |

|    |               |               |               |
|----|---------------|---------------|---------------|
| -3 | 0.0028929569  | 0.0013704353  | 0.0113490933  |
| -4 | 0.0021279596  | -0.0048366878 | -0.0078011024 |
| -5 | -0.0017242863 | 0.0004352130  | -0.0002449467 |
| -6 | 0.0009325623  | -0.0015164745 | -0.0029801961 |
| -7 | -0.0034448133 | 0.0040191339  | 0.0012957002  |

---

CASSCF(12,11)/6-311G(d,p) = -169.7010426

MP2(12,11)/6-311++G(3df,3pd)//CASSCF(12,11)/6-311G(d,p) = -169.7311529

#### (4) Int-1 (isoacrylonitrile)

---

| Atomic<br>Number | Coordinates (Angstroms) |          |          |
|------------------|-------------------------|----------|----------|
|                  | X                       | Y        | Z        |
| 1                | 0.000000                | 0.000000 | 0.000000 |
| 6                | 0.000000                | 0.000000 | 1.072912 |
| 6                | 1.155747                | 0.000000 | 1.738709 |
| 1                | 2.129673                | 0.000000 | 1.238284 |
| 1                | -0.944837               | 0.000000 | 1.582242 |
| 7                | 1.220509                | 0.000000 | 3.126897 |
| 6                | 1.275653                | 0.000000 | 4.308941 |

---

CASSCF(12,11)/6-311G(d,p) = -169.9335427

MP2(12,11)/6-311++G(3df,3pd)//CASSCF(12,11)/6-311G(d,p) = -169.9547482

#### (5) TS1

---

| Atomic<br>Number | Coordinates (Angstroms) |           |          |
|------------------|-------------------------|-----------|----------|
|                  | X                       | Y         | Z        |
| 1                | 0.000000                | 0.000000  | 0.000000 |
| 6                | 0.000000                | 0.000000  | 1.059648 |
| 6                | 1.054224                | 0.000000  | 1.906249 |
| 1                | 2.018133                | 0.300297  | 2.244455 |
| 1                | -0.474040               | 0.198484  | 2.449639 |
| 6                | -0.057036               | -0.308010 | 3.527387 |
| 7                | -0.731580               | -0.445024 | 4.490621 |
| -1               | 0.40                    | 0.50      | 0.14     |
| -2               | -0.12                   | -0.06     | 0.05     |
| -3               | 0.00                    | -0.04     | 0.10     |
| -4               | 0.08                    | 0.31      | 0.04     |
| -5               | -0.08                   | 0.38      | -0.52    |
| -6               | 0.06                    | -0.02     | -0.07    |
| -7               | 0.02                    | 0.02      | -0.05    |

---

CASSCF(12,11)/6-311G(d,p) = -169.83597251

MP2(12,11)/6-311++G(3df,3pd)//CASSCF(12,11)/6-311G(d,p)= -169.8531529

**(6) TS2**

---

| Atomic<br>Number | Coordinates (Angstroms) |           |          |
|------------------|-------------------------|-----------|----------|
|                  | X                       | Y         | Z        |
| 1                | 0.000000                | 0.000000  | 0.000000 |
| 6                | 0.000000                | 0.000000  | 1.060081 |
| 6                | 0.385291                | 0.262777  | 2.179750 |
| 1                | 0.843161                | 0.459367  | 3.107144 |
| 1                | -0.988648               | -0.458756 | 2.108033 |
| 7                | -1.133834               | -0.466376 | 3.129892 |
| 6                | -1.341899               | -0.523473 | 4.298116 |
| -1               | -0.60                   | 0.29      | 0.01     |
| -2               | -0.01                   | 0.14      | 0.02     |
| -3               | 0.02                    | -0.05     | 0.04     |
| -4               | 0.06                    | -0.30     | 0.04     |
| -5               | 0.08                    | -0.53     | -0.01    |
| -6               | 0.08                    | -0.26     | -0.03    |
| -7               | -0.06                   | 0.26      | -0.03    |

---

CASSCF(12,11)/6-311G(d,p) = -169.8055265

MP2(12,11)/6-311++G(3df,3pd)//CASSCF(12,11)/6-311G(d,p)= -169.8265658

**(7) HCCH + HCN (monomer)**

---

| Atomic<br>Number | Coordinates (Angstroms) |          |          |
|------------------|-------------------------|----------|----------|
|                  | X                       | Y        | Z        |
| 1                | 0.000000                | 0.000000 | 0.000000 |
| 6                | 0.000000                | 0.000000 | 1.055679 |
| 6                | 0.000000                | 0.000000 | 2.273363 |
| 1                | 0.000000                | 0.000000 | 3.329041 |
| 1                | 0.000000                | 0.000000 | 0.000000 |
| 6                | 0.000000                | 0.000000 | 1.057614 |
| 7                | 0.000000                | 0.000000 | 2.209371 |

---

CASSCF(12,11)/6-311G(d,p) = -169.9197985

MP2(12,11)/6-311++G(3df,3pd)//CASSCF(12,11)/6-311G(d,p)= -169.9377115

**(8) HCCH + HCN (linear)**

---

| Atomic<br>Number | Coordinates (Angstroms) |   |   |
|------------------|-------------------------|---|---|
|                  | X                       | Y | Z |

---

|   |          |          |          |
|---|----------|----------|----------|
| 1 | 0.000000 | 0.000000 | 0.000000 |
| 6 | 0.000000 | 0.000000 | 1.058326 |
| 7 | 0.000000 | 0.000000 | 2.221852 |
| 1 | 0.000000 | 0.000000 | 4.753376 |
| 6 | 0.000000 | 0.000000 | 5.811454 |
| 6 | 0.000000 | 0.000000 | 7.018159 |
| 1 | 0.000000 | 0.000000 | 8.073619 |

-----  
 CASSCF(12,11)/6-311G(d,p) = -169.9222299

MP2(12,11)/6-311++G(3df,3pd)//CASSCF(12,11)/6-311G(d,p)= -169.9455159

**(9) HCCH + HCN (T-shape; T-int-2)**

| Atomic<br>Number | Coordinates (Angstroms) |          |           |
|------------------|-------------------------|----------|-----------|
|                  | X                       | Y        | Z         |
| 6                | -0.001000               | 0.000000 | 0.609255  |
| 1                | 2.846769                | 0.000000 | 0.000000  |
| 6                | 0.000000                | 0.000000 | -0.609255 |
| 1                | 0.000000                | 0.000000 | -1.665501 |
| 1                | 0.000000                | 0.000000 | 1.665501  |
| 6                | 3.905719                | 0.000000 | 0.000000  |
| 7                | 5.057726                | 0.000000 | 0.000000  |

-----  
 CASSCF(12,11)/6-311G(d,p) = -169.9225599

MP2(12,11)/6-311++G(3df,3pd)//CASSCF(12,11)/6-311G(d,p)= -169.9455159

**(10) TS3**

| Atomic<br>Number | Coordinates (Angstroms) |          |          |
|------------------|-------------------------|----------|----------|
|                  | X                       | Y        | Z        |
| 1                | 0.000000                | 0.000000 | 0.000000 |
| 6                | 0.000000                | 0.000000 | 1.055702 |
| 6                | 0.000000                | 0.000000 | 2.262035 |
| 1                | 0.134531                | 0.114621 | 3.724807 |
| 1                | -0.736076               | 0.190855 | 4.697688 |
| 6                | -0.965043               | 0.515147 | 6.066232 |
| 7                | -1.190678               | 0.758736 | 7.172602 |
| -1               | 0.10                    | -0.08    | 0.14     |
| -2               | 0.03                    | 0.00     | 0.14     |
| -3               | -0.10                   | 0.05     | 0.14     |
| -4               | -0.47                   | -0.03    | -0.78    |
| -5               | 0.16                    | 0.00     | 0.16     |
| -6               | 0.08                    | -0.03    | -0.10    |
| -7               | 0.00                    | -0.01    | -0.12    |

-----  
 CASSCF(12,11)/6-311G(d,p) = -169.7754481

MP2(12,11)/6-311++G(3df,3pd)//CASSCF(12,11)/6-311G(d,p)= -169.7984015

**(11) HCC(CN) + H2**

---

| Atomic<br>Number | Coordinates (Angstroms) |          |          |
|------------------|-------------------------|----------|----------|
|                  | X                       | Y        | Z        |
| 1                | 0.000000                | 0.000000 | 0.000000 |
| 6                | 0.000000                | 0.000000 | 1.055681 |
| 6                | 0.000000                | 0.000000 | 2.249202 |
| 6                | 0.000000                | 0.000000 | 3.631560 |
| 7                | 0.000000                | 0.000000 | 4.800493 |
| 1                | 0.000000                | 0.000000 | 0.000000 |
| 1                | 0.000000                | 0.000000 | 0.755697 |

---

CASSCF(12,11)/6-311G(d,p) = -169.8805359

MP2(12,11)/6-311++G(3df,3pd)//CASSCF(12,11)/6-311G(d,p) = -169.8997115

**(12) HCCH + HNC (monomer)**

---

| Atomic<br>Number | Coordinates (Angstroms) |          |          |
|------------------|-------------------------|----------|----------|
|                  | X                       | Y        | Z        |
| 1                | 0.000000                | 0.000000 | 0.000000 |
| 6                | 0.000000                | 0.000000 | 1.055679 |
| 6                | 0.000000                | 0.000000 | 2.273363 |
| 1                | 0.000000                | 0.000000 | 3.329041 |
| 1                | 0.000000                | 0.000000 | 0.000000 |
| 7                | 0.000000                | 0.000000 | 0.983676 |
| 6                | 0.000000                | 0.000000 | 2.152315 |

---

CASSCF(12,11)/6-311G(d,p) = -169.8887559

MP2(12,11)/6-311++G(3df,3pd)//CASSCF(12,11)/6-311G(d,p)= -169.9077115

**(13) HCCH + HNC (linear)**

---

| Atomic<br>Number | Coordinates (Angstroms) |          |          |
|------------------|-------------------------|----------|----------|
|                  | X                       | Y        | Z        |
| 1                | 0.000000                | 0.000000 | 0.000000 |
| 7                | 0.000000                | 0.000000 | 0.984382 |
| 6                | 0.000000                | 0.000000 | 2.163775 |
| 1                | 0.000000                | 0.000000 | 4.906940 |
| 6                | 0.000000                | 0.000000 | 5.964342 |
| 6                | 0.000000                | 0.000000 | 7.171013 |

---

1 0.000000 0.000000 8.225609

-----  
CASSCF(12,11)/6-311G(d,p) = -169.8955773

MP2(12,11)/6-311++G(3df,3pd)//CASSCF(12,11)/6-311G(d,p)= -169.9214689

**(14) HCCH + HNC (T-shape; T-int-3)**

-----

| Atomic<br>Number | Coordinates (Angstroms) |          |           |
|------------------|-------------------------|----------|-----------|
|                  | X                       | Y        | Z         |
| 6                | 0.000000                | 0.000000 | 0.603417  |
| 1                | 2.571855                | 0.000000 | 0.000000  |
| 6                | 0.000000                | 0.000000 | -0.603417 |
| 1                | 0.000000                | 0.000000 | -1.659208 |
| 1                | 0.000000                | 0.000000 | 1.659208  |
| 7                | 3.558805                | 0.000000 | 0.000000  |
| 6                | 4.739413                | 0.000000 | 0.000000  |

-----

CASSCF(12,11)/6-311G(d,p) = -169.896582

MP2(12,11)/6-311++G(3df,3pd)//CASSCF(12,11)/6-311G(d,p)= -169.9224676

**(15) TS4**

-----

| Atomic<br>Number | Coordinates (Angstroms) |          |          |
|------------------|-------------------------|----------|----------|
|                  | X                       | Y        | Z        |
| 1                | 0.000000                | 0.000000 | 0.000000 |
| 6                | 0.000000                | 0.000000 | 1.055839 |
| 6                | 0.000000                | 0.000000 | 2.260992 |
| 1                | 0.213163                | 0.000002 | 3.897840 |
| 1                | -0.819304               | 0.000003 | 4.687785 |
| 7                | -1.888340               | 0.000005 | 5.953845 |
| 6                | -2.538358               | 0.000006 | 6.941883 |
| -1               | 0.00                    | 0.00     | -0.01    |
| -2               | 0.00                    | 0.00     | -0.01    |
| -3               | 0.00                    | 0.00     | -0.02    |
| -4               | 0.06                    | 0.00     | 0.31     |
| -5               | 0.63                    | 0.00     | -0.71    |
| -6               | -0.03                   | 0.00     | 0.03     |
| -7               | -0.02                   | 0.00     | 0.03     |

-----

CASSCF(12,11)/6-311G(d,p) = -169.9225599

MP2(12,11)/6-311++G(3df,3pd)//CASSCF(12,11)/6-311G(d,p)= -169.7520363

**(16) Pro**

-----

| Atomic<br>Number | Coordinates (Angstroms) |   |   |
|------------------|-------------------------|---|---|
|                  | X                       | Y | Z |

---

|   |          |          |          |
|---|----------|----------|----------|
| 1 | 0.000000 | 0.000000 | 0.000000 |
| 6 | 0.000000 | 0.000000 | 1.055681 |
| 6 | 0.000000 | 0.000000 | 2.249202 |
| 6 | 0.000000 | 0.000000 | 3.631560 |
| 7 | 0.000000 | 0.000000 | 4.800493 |

---

|   |          |          |          |
|---|----------|----------|----------|
| 1 | 0.000000 | 0.000000 | 0.000000 |
| 1 | 0.000000 | 0.000000 | 0.755697 |

---

CASSCF(12,11)/6-311G(d,p) = -169.8805359

MP2(12,11)/6-311++G(3df,3pd)//CASSCF(12,11)/6-311G(d,p)= -169.8587115

**(17) TS5 (dark)**

---

| Atomic<br>Number | Coordinates (Angstroms) |           |          |
|------------------|-------------------------|-----------|----------|
|                  | X                       | Y         | Z        |
| 1                | 0.000000                | 0.000000  | 0.000000 |
| 6                | 0.000000                | 0.000000  | 1.072876 |
| 6                | 1.157232                | 0.000000  | 1.737224 |
| 1                | 2.123677                | 0.011187  | 1.282436 |
| 1                | -0.944313               | -0.069230 | 1.577677 |
| 7                | 1.147166                | -0.825620 | 3.307666 |
| 6                | 1.260571                | 0.373093  | 3.405101 |
| -1               | -0.02                   | -0.27     | -0.04    |
| -2               | 0.00                    | 0.03      | -0.03    |
| -3               | 0.02                    | 0.42      | -0.06    |
| -4               | 0.00                    | 0.27      | -0.11    |
| -5               | -0.01                   | 0.12      | -0.03    |
| -6               | 0.01                    | -0.23     | 0.54     |
| -7               | -0.03                   | -0.19     | -0.52    |

---

CASSCF(12,11)/6-311G(d,p) = -169.8753205

MP2(12,11)/6-311++G(3df,3pd)//CASSCF(12,11)/6-311G(d,p)= -169.8968823
